# Supplementary material
Source: publisher site journal article supplement (https://www.dovepress.com/article/543586)
Supplement: Supplementary file 1 [file 543586%20Supplementary%20Material.docx]

**Supplementary Materials**

**Supplementary Table S1: Pulmonary function tests data of hemodialysis patients with COPD**

| **Parameter** | **N** | **Value, mean±SD** |
| --- | --- | --- |
| **FEV1%pred** | 43 | 59.6±22.3 |
| **FEV1, L** | 43 | 1.64±0.83 |
| **FVC%pred** | 43 | 71.4±20.2 |
| **FVC, L** | 43 | 2.63±0.98 |
| **FEV1/FVC** | 43 | 0.61±0.1 |
| **DLCO** | 30 | 49.6±20 |

DLCO, diffusion capacity for carbon monoxide; FEV1, forced expiratory volume in 1 second; FVC, forced vital capacity.

**Supplementary Table S2: Multivariate regression analysis of predictors for ACS**

| **Variable** | **OR** | **95%CI** | **p-value** |
| --- | --- | --- | --- |
| **Age at HD initiation** | 1.004 | 0.98-1.03 | 0.741 |
| **Male gender** | 2.5 | 1.13-5.53 | **0.024** |
| **COPD group** | 2.19 | 0.98-4.93 | 0.056 |
| **IHD** | 4.99 | 2.23-11.16 | **<0.001** |
| **Heart failure** | 0.86 | 0.43-1.74 | 0.671 |
| **Diabetes mellitus** | 1.65 | 0.82-3.33 | 0.171 |

ACS, acute coronary syndrome; COPD, chronic obstructive pulmonary disease; IHD, history of ischemic heart disease

Significant p-values (<0.05) are presented in **bold**.

**Supplementary Figure S1: Flowchart of study participants**

**
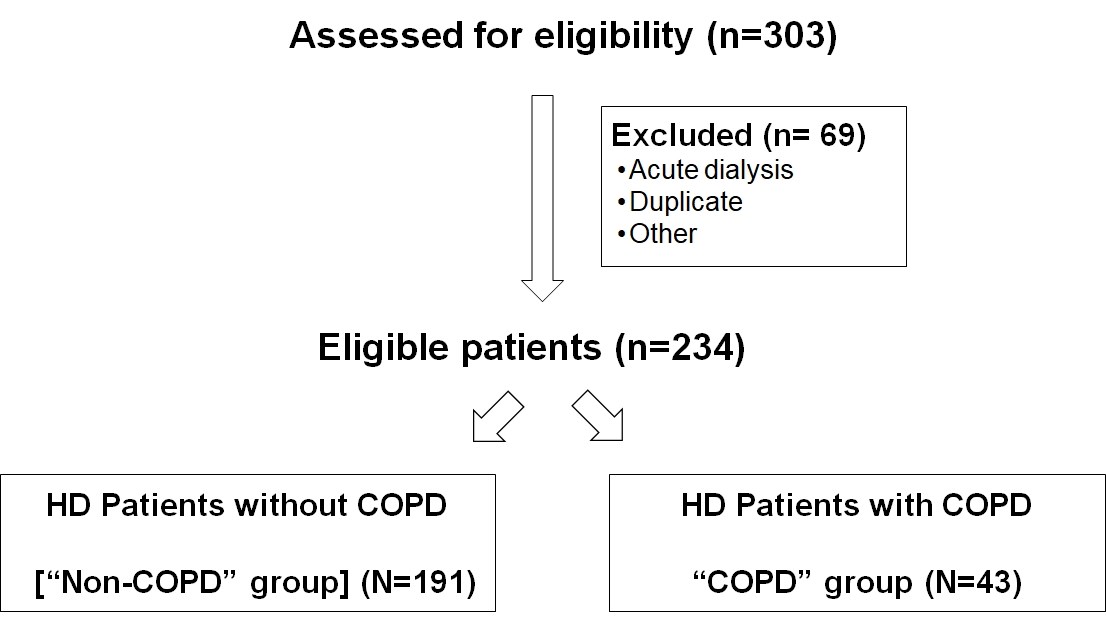
**

COPD, chronic obstructive pulmonary disease; HD, hemodialysis.
